# Supplementary material
Source: publisher figshare collection journal article supplement (https://wellcome.figshare.com/ndownloader/files/37781841)
Supplement: Supplementary file 1 [file 37781841]

## Sheet: All-CTs
ID	Required to comply with May18 policy	Grant code	Trial Title	Grantholder Organisation	Grant Type	Grant Start Date	Grant End Date	Trial registry ID	Trial registry	Trial start date	Trial end date	Protocol available	SAP available	Summary results posted	Provided Data sharing plan	Plan to share IPD	Is Wellcome listed as a funder on registry?	Is grant no listed on registry?	Registry submission date	Days between registration and recruitment	Prospectively registered
1	Yes	203481/Z/16/Z	MENSA - An innovative antimalarial treatment – Proof of Efficacy in Malaria Human Challenge Model	Merck KGaA	Translation Fund	2018-08-18	2020-02-28	NCT03261401	ClinicalTrials.gov	2017-09-15	2019-06-14	N	N	N	N	NA	N	N	2017-08-18	28	Y
2	Yes	209943/Z/17/Z	Interaction between omeprazole and gliclazide in CYP2C19 normal/ ultrarapid metabolisers	Faculty of Pharmacy University of Sarajevo	Seed Award in Science	2018-09-07	2021-09-07	NCT04198948	ClinicalTrials.gov	2019-03-04	2019-08-05	Y	Y	Y	Y	Y	N	N	2019-12-13	-284	N
3	Yes	212399/Z/18/Z	Clinical development of a Novel, Live, Attenuated Oral Combination Shigella/ETEC Vaccine	EveliQure Biotechnologies GmbH	Innovator Award	2018-06-04	2020-06-03	No update	NA	NA	NA	NA	NA	NA	NA	NA	NA	NA	NA	NA	NA
4	Yes	212346/Z/18/Z	21st Century Treatments for Sustainable Elimination of Leishmasiasis	Drugs for Neglected Diseases Initiative	Innovations Project Award	2019-01-25	2022-03-24	NCT03929016	clinicaltrials.gov	2019-04-04	2019-12-06	N	N	N	Y	Y	N	N	2019-04-26	-22	N
5	Yes	217652/Z/19/Z	Immunological pathways in Hidradenitis Suppurativa and potential therapeutic targets.	University College Dublin	PhD Training Fellowship for Clinicians	2019-01-07	2023-01-13	2016-001566-28	EudraCT	2017-01-11	2020-08-31	Y	N	N	N	NA	N	N	2016-06-07	218	Y
6	Yes	215474/Z/19/Z	Duration of immunity 10 years after a yellow fever vaccine dose-response study – a complementary study	Oswaldo Cruz Foundation	DFID-Wellcome Epidemic Preparedness Grant	2019-05-01	2021-02-01	NCT04416477	ClinicalTrials.gov	2019-04-08	2020-08-31	N	N	N	Y	N	Y	N	2020-05-21	-409	N
7	Yes	215898/Z/19/Z	Entervax: Clinical Evaluation of a Bivalent Typhoid-Paratyphoid Enteric Fever Vaccine	Prokarium	Innovations Project Award	2019-06-01	2022-09-30	NCT04349553	ClinicalTrials.gov	2019-12-16	2021-02-15	N	N	N	Y	N	N	N	2020-04-16	-122	N
8	Yes	216346/Z/19/Z	Tracking tumour evolution through adjuvant therapy in triple negative breast cancer	Institute of Cancer Research	PhD Training Fellowship for Clinicians	2018-10-01	2022-06-16	NCT03145961	ClinicalTrials.gov	2017-12-21	2024-03-31	N	N	N	Y	Undecided	N	N	2017-05-09	226	Y
9	Yes	217692/Z/19/Z	Novel Treatment for Severe Malaria	Novartis Pharma AG	Innovations Priority Project	2020-08-28	2024-08-27	NCT04321252	ClinicalTrials.gov	2020-07-22	2020-11-10	Y	Y	Y	Y	N	Y	Y	2020-03-25	119	Y
10	Yes	216421/Z/19/Z	Point-of-care viral load testing to enhance primary care HIV services in South Africa	University of Oxford	PhD Training Fellowship for Clinicians	2018-10-01	2022-12-31	PACTR202001785886049	Pan African Clinical Trial Registry	2020-08-20	2023-03-24	Y	Y	N	Y	Y	Y	Y	2020-01-23	210	Y
11	Yes	216421/Z/19/Z	Point-of-care viral load testing to enhance primary care HIV services in South Africa	University of Oxford	PhD Training Fellowship for Clinicians	2018-10-01	2022-12-31	PACTR202002785960123	Pan African Clinical Trial Registry	2020-04-01	2022-10-01	N	N	N	Y	Y	Y	Y	2020-02-12	49	Y
12	Yes	207472/Z/17/Z	SEVERE CORNEAL INFECTIONS: PREVENTION, DIAGNOSIS AND TREATMENT	London School of Hygiene & Tropical Medicine	Senior Research Fellowship Clinical Renewal	2018-05-01	2023-04-01	ISRCTN14332621	ISRCTN Registry	2019-06-01	2021-02-08	Y	Y	Y	Y	Y	Y	Y	2019-05-09	23	Y
13	Yes	207472/Z/17/Z	SEVERE CORNEAL INFECTIONS: PREVENTION, DIAGNOSIS AND TREATMENT	London School of Hygiene & Tropical Medicine	Senior Research Fellowship Clinical Renewal	2018-05-01	2023-04-01	ISRCTN95560917	ISRCTN Registry	2022-03-01	2024-08-01	N	N	N	Y	Y	Y	Y	2021-10-27	125	Y
14	Yes	207472/Z/17/Z	SEVERE CORNEAL INFECTIONS: PREVENTION, DIAGNOSIS AND TREATMENT	London School of Hygiene & Tropical Medicine	Senior Research Fellowship Clinical Renewal	2018-05-01	2023-04-01	ISRCTN87195453	ISRCTN Registry	2021-06-01	2022-12-31	N	Y	N	Y	Y	Y	Y	2020-08-27	278	Y
15	Yes	221307/Z/20/Z	Chloroquine/Hydroxychloroquine prevention of coronavirus disease (COVID-19) in the healthcare setting; a randomised, placebo-controlled prophylaxis study (COPCOV)	University of Oxford	Therapeutics Accelerator	2020-03-28	2022-12-30	NCT04303507	ClinicalTrials.gov	2020-04-29	2022-03-22	N	N	N	Y	Y	N	N	2020-03-11	49	Y
16	Yes	210479/Z/18/Z	Using social networks to understand and intervene on HIV epidemic spread	University College London	Sir Henry Dale Fellowship	2019-01-01	2025-06-30	Not started yet	Not started yet	NA	NA	NA	NA	NA	NA	NA	NA	NA	NA	NA	NA
17	Yes	211433/Z/18/Z	Malawi Accelerated Research in Vaccines, Experimental and Laboratory Systems	Liverpool School of Tropical Medicine	Controlled Human Infection Models	2019-01-01	2023-12-31	PACTR202008503507113	Pan African Clinical Trials Registry	2021-04-27	2023-05-25	Y	N	N	Y	Y	Y	N	2020-08-03	267	Y
18	Yes	212346/Z/18/Z	21st Century Treatments for Sustainable Elimination of Leishmasiasis	Drugs for Neglected Diseases Initiative	Innovations Project Award	2019-01-25	2022-03-24	NCT04504435	clinicaltrials.gov	2020-09-29	2023-04-27	N	N	N	Y	Y	N	N	2020-08-07	53	Y
19	Yes	209265/Z/17/Z	Severe Malaria Africa – A consortium for Research and Trials (SMAART)	Imperial College London	Collaborative Award in Science	2019-06-30	2023-06-30	ISRCTN76942974	ISRCTN Registry	2020-01-30	2021-06-30	N	N	N	Y	Y	Y	Y	2019-01-18	377	Y
20	Yes	209265/Z/17/Z	Severe Malaria Africa – A consortium for Research and Trials (SMAART)	Imperial College London	Collaborative Award in Science	2019-06-30	2023-06-30	ISRCTN49726849	ISRCTN Registry	2017-07-01	2021-11-30	N	N	N	Y	Undecided	N	N	2017-10-27	-118	N
21	Yes	209265/Z/17/Z	Severe Malaria Africa – A consortium for Research and Trials (SMAART)	Imperial College London	Collaborative Award in Science	2019-06-30	2023-06-30	PACTR202007890194806	Pan African Clinical Trials Registry	2020-07-15	Not listed	N	N	N	N	NA	N	N	2020-07-02	13	Y
22	Yes	212346/Z/18/Z	21st Century Treatments for Sustainable Elimination of Leishmasiasis	Drugs for Neglected Diseases Initiative	Innovations Project Award	2019-01-25	2022-03-24	ISRCTN30122193	ISRCTN Registry	2020-12-20	2021-10-12	Y	N	N	Y	Y	Y	N	2021-01-12	-23	N
23	Yes	212346/Z/18/Z	21st Century Treatments for Sustainable Elimination of Leishmasiasis	Drugs for Neglected Diseases Initiative	Innovations Project Award	2019-01-25	2022-03-24	ISRCTN54981564	ISRCTN Registry	2020-02-04	2022-03-08	Y	N	N	Y	Y	Y	N	2020-06-26	-143	N
24	Yes	216042/Z/19/Z	Reducing meat intake to mitigate climate change and improve health	University of North Carolina at Chapel Hill	OPOH Climate Change and Health	2019-09-01	2023-09-01	NCT04716010	ClinicalTrials.gov	2021-05-01	2021-10-28	Y	Y	Y	Y	N	Y	N	2021-01-20	101	Y
25	Yes	209198/Z/17/Z	The development of insulin resistance and anabolic resistance during muscle disuse: what is the role of fuel integration?	University of Exeter	Sir Henry Wellcome Postdoctoral Fellowship	2018-10-01	2023-12-31	NCT03866512	ClinicalTrials.gov	2019-05-10	2021-07-01	N	N	N	Y	N	Y	N	2019-03-07	64	Y
26	Yes	215727/Z/19/Z	GlycoShig3: age-descending phase 2a study into target population with the SF2a-TT15 synthetic carbohydrate-based vaccine	Institut Pasteur	Innovations Priority Project	2019-03-29	2023-12-31	NCT04602975	ClinicalTrials.gov	2020-10-06	2023-09-30	N	N	N	Y	N	Y	N	2020-10-26	-20	N
27	Yes	221590/Z/20/Z	AGILE: Seamless Phase I/IIa Platform for the Rapid Evaluation of Candidates for COVID-19 treatment	University of Liverpool	Therapeutics Accelerator	2021-02-01	2023-01-31	NCT04746183	ClinicalTrials.gov	2020-07-03	2024-04-30	Y	N	N	Y	Y	N	N	2021-02-09	-221	N
28	Yes	215695/Z/19/Z	Saving young lives: Triage and management of sepsis in children using the point-of-care Paediatric Rapid Sepsis Trigger (PRST) tool	University of British Columbia	Innovator Award: Digital Technologies	2020-01-06	2022-01-05	NCT04304235	ClinicalTrials.gov	2020-04-27	2022-02-28	Y	Y	N	Y	Y	N	N	2020-03-11	47	Y
29	Yes	221575/Z/20/Z	AVID-CC Adalimumab for COVID19 in community care	University of Oxford	Therapeutics Accelerator	2020-08-01	2021-09-30	ISRCTN33260034	Trial STOPPED	2020-10-20	2021-12-31	NA	NA	N	Y	Y	Y	Y	2020-08-19	62	Y
30	Yes	222406/Z/21/Z	RECOVERY International	University of Oxford	Therapeutics Accelerator	2020-12-01	2023-05-31	NCT04381936	ClinicalTrials.gov	2020-03-19	2022-12-30	Y	Y	N	Y	Y	Y	N	2020-05-11	-53	N
31	Yes	214554/Z/18/Z	The development and feasibility trial of a complex intervention to improve AccesS to living-donor Kidney transplantation: the ASK trial	University of Bristol	Clinical Research Career Development Fellowship	2019-04-15	2023-12-31	ISRCTN10989132	ISRCTN Registry	2018-01-01	2023-11-01	N	N	N	Y	Y	Y	Y	2020-10-30	-1033	N
32	Yes	212336/Z/18/Z	Plasmodium vivax Volunteer Infection Studies in Thailand	University of Oxford	Controlled Human Infection Models	2018-11-01	2023-11-01	NCT04083508	ClinicalTrials.gov	2020-10-05	2023-08-04	Y	Y	N	Y	Y	Y	Y	2019-09-10	391	Y
33	Yes	212336/Z/18/Z	Plasmodium vivax Volunteer Infection Studies in Thailand	University of Oxford	Controlled Human Infection Models	2018-11-01	2023-11-01	NCT05071079	ClinicalTrials.gov	2022-05-23	2023-04-30	Y	Y	N	Y	Y	Y	Y	2021-10-07	228	Y
34	Yes	214207/Z/18/Z	Evaluating the impact of a Lao language mobile phone antimicrobial use guideline application on antimicrobial prescribing in Laos	University of Oxford	International Training Fellowship	2019-05-01	2022-07-31	NCT04914793	ClinicalTrials.gov	2021-01-11	2022-12-31	Y	Y	N	Y	N	Y	N	2021-06-07	-147	N
35	Yes	215691/Z/19/Z	Randomized controlled trial of interventions for treatment of shock in children with severe acute malnutrition and cholera or other dehydrating diarrheas	International Centre for Diarrhoeal Disease Research	DFID-Wellcome Epidemic Preparedness Grant	2021-06-03	2023-12-03	NCT04750070	ClinicalTrials.gov	2021-08-17	2023-04-30	N	N	N	Y	N	N	N	2021-02-11	187	Y
36	Yes	220564/Z/20/Z	Computer Aided Screening for Tuberculosis in Low Resource Environments (CASTLE)	London School of Hygiene & Tropical Medicine	PhD Training Fellowship for Clinicians	2019-08-07	2023-04-30	NCT04545164	ClinicalTrials.gov	2020-09-02	2022-05-26	N	N	N	Y	Y	Y	N	2020-09-10	-8	N
37	Yes	212210/Z/18/Z	Typhoid infection model in India	Translational Health Science and Technology Institute	Controlled Human Infection Models	2019-05-10	2023-05-10	Not started yet	Not started yet	NA	NA	NA	NA	NA	NA	NA	NA	NA	NA	NA	NA
38	Yes	212346/Z/18/Z	21st Century Treatments for Sustainable Elimination of Leishmasiasis	Drugs for Neglected Diseases Initiative	Innovations Project Award	2019-01-25	2022-03-24	NCT03874234	Trial STOPPED	2019-04-30	2022-03-18	Y	Y	N	Y	Y	N	N	2019-03-12	49	Y
39	Yes	212265/Z/18/Z	Critical questions for dolutegravir-based ART in Africa	University of Cape Town	Investigator Award in Science	2019-01-02	2023-01-02	NCT03991013	ClinicalTrials.gov	2019-08-01	2022-11-30	Y	Y	N	Y	Y	Y	N	2019-06-19	43	Y
40	Yes	212265/Z/18/Z	Critical questions for dolutegravir-based ART in Africa	University of Cape Town	Investigator Award in Science	2019-01-02	2023-01-02	NCT03851588	ClinicalTrials.gov	2019-12-19	2022-06-28	Y	Y	N	Y	Y	Y	N	2019-02-22	300	Y
41	Yes	214321/Z/18/Z	Evaluation of novel therapeutic strategies to accelerate bacterial clearance and host recovery in disseminated HIV-associated tuberculosis	University of Cape Town	Senior Research Fellowship	2019-06-01	2020-04-30	NCT04951986	ClinicalTrials.gov	2021-08-11	2024-12-31	N	N	N	Y	Y	N	N	2021-07-07	35	Y
42	Yes	214374/Z/18/Z	Gonococcal vaccine initiative	University of Oxford	Collaborative Award in Science	2019-06-01	2023-06-01	NCT04297436	ClinicalTrials.gov	2021-05-31	2022-02-28	N	N	N	Y	Y	N	N	2020-03-05	452	Y
43	Yes	209589/Z/17/Z	Examining physiological hypoxia at menstruation to define the mechanisms that underpin endometrial resilience and heavy menstrual bleeding	University of Edinburgh	Clinical Research Career Development Fellowship	2019-08-01	2025-06-30	Not started yet	Not started yet	NA	NA	NA	NA	NA	NA	NA	NA	NA	NA	NA	NA
44	Yes	215908/Z/19/Z	Diagnostics of Joints Using Magic Angle Directional Imaging	Imperial College London	Innovator Award	2019-08-01	2022-08-01	Not started yet	Not started yet	NA	NA	NA	NA	NA	NA	NA	NA	NA	NA	NA	NA
45	Yes	215908/Z/19/Z	Scaling-up Health-Arts Programmes: Implementation and Effectiveness Research (SHAPER)	King's College London	Discretionary Award – C&S	2019-10-01	2024-01-01	NCT04719468	ClinicalTrials.gov	2021-02-01	2023-09-01	Y	N	N	Y	N	N	N	2021-01-22	10	Y
46	Yes	216447/Z/19/Z	Chicken liver and eggshell crackers as a safe and affordable animal-source food for overcoming micronutrient deficits during pregnancy and lactation in Indonesia: a double-blind randomised controlled trial	SEAMEO RECFON	International Training Fellowship	2020-02-20	2023-02-20	NCT04564222	ClinicalTrials.gov	2020-11-11	2023-09-30	Y	N	N	Y	Y	N	N	2020-09-25	47	Y
47	Yes	218238/Z/19/Z	GMMA-based Shigella vaccine serology and schedule finding trial	GlaxoSmithKline Biologicals SA	Innovations Priority Project	2021-07-01	2024-06-30	No update	NA	NA	NA	NA	NA	NA	NA	NA	NA	NA	NA	NA	NA
48	Yes	218443/Z/19/Z	Development of a Rapidly Active Live-attenuated Cholera Vaccine	Brigham & Women's Hospital	Innovations Priority Project	2019-09-01	2022-06-30	Not started yet	Not started yet	NA	NA	NA	NA	NA	NA	NA	NA	NA	NA	NA	NA
49	Yes	220531/Z/20/Z	Defining the pathophysiology of snakebite induced local tissue damage and evaluating tolerance of a repurposed orally administered venom inhibitor	Liverpool School of Tropical Medicine	PhD Training Fellowship for Clinicians	2019-09-01	2023-05-04	PACTR202103718625048	PACTR	2021-09-01	Not listed	Y	Y	N	N	NA	Y	N	2021-03-03	182	Y
50	Yes	210755/Z/18/Z	Disorders of Thyroid Hormone Action: Diagnosis, Pathophysiology and Therapy	University of Cambridge	Investigator Award in Science	2018-08-01	2024-07-31	NCT02396459	ClinicalTrials.gov	2020-09-01	2024-04-30	N	N	N	N	NA	N	N	2015-03-07	2005	Y
51	Yes	215674/Z/19/Z	Evidence Based Targeted Water, Sanitation, and Hygiene Interventions to Reduce Cholera in Hotspots in the Democratic Republic of the Congo	Johns Hopkins Bloomberg School of Public Health	DFID-Wellcome Epidemic Preparedness Grant	2019-10-01	2022-12-01	NCT05166850	ClinicalTrials.gov	2021-12-22	2023-06-01	N	N	N	Y	N	N	N	2021-12-22	0	Y
52	Yes	216005/Z/19/Z	STEP - Stratification and Treatment in Early Psychosis	King's College London	Innovations Project Award	2019-10-01	2024-09-30	No update	NA	NA	NA	NA	NA	NA	NA	NA	NA	NA	NA	NA	NA
53	Yes	216458/Z/19/Z	Creating demand for Fishermen’s Schistosomiasis and HIV services (FISH): piloting and delivery of a 3-arm cluster randomised control trial (cRCT) in Malawi	Liverpool School of Tropical Medicine	International Intermediate Fellowship	2019-11-01	2025-09-01	ISRCTN14354324	ISRCTN Registry	2021-01-01	2022-12-30	Y	Y	N	Y	Y	Y	Y	2020-09-28	95	Y
54	Yes	216273/Z/19/Z	Randomised controlled trial of cipro vs standard of care in plague	University of Oxford	DFID-Wellcome Epidemic Preparedness Grant	2019-11-01	2023-05-01	NCT04110340	ClinicalTrials.gov	2020-02-15	2021-03-31	Y	N	N	Y	Undecided	N	N	2019-10-01	137	Y
55	Yes	211100/Z/18/Z	Use of 68Ga-DOTATATE PET to identify the “inflammatory phenotype” in cardiovascular disease: a clinical translational programme	University of Cambridge	Clinical Research Career Development Fellowship	2019-04-01	2025-04-01	NCT04071691	ClinicalTrials.gov	2019-06-25	2023-08-31	Y	N	N	Y	N	Y	N	2019-08-16	-52	N
56	Yes	211100/Z/18/Z	Use of 68Ga-DOTATATE PET to identify the “inflammatory phenotype” in cardiovascular disease: a clinical translational programme	University of Cambridge	Clinical Research Career Development Fellowship	2019-04-01	2025-04-01	NCT04073797	ClinicalTrials.gov	2019-10-01	2023-10-01	N	N	N	Y	N	Y	N	2019-08-27	35	Y
57	Yes	215619/Z/19/Z	Deep conditioning using CRISPR edited T cells	University College London	Collaborative Award in Science	2019-12-01	2024-06-01	Not started yet	Not started yet	NA	NA	NA	NA	NA	NA	NA	NA	NA	NA	NA	NA
58	Yes	215619/Z/19/Z	Deep conditioning using CRISPR edited T cells	University College London	Collaborative Award in Science	2019-12-01	2024-06-01	Not started yet	Not started yet	NA	NA	NA	NA	NA	NA	NA	NA	NA	NA	NA	NA
59	Yes	220551/Z/20/Z	Dietary management of type 2 diabetes in primary care	University of Oxford	PhD Training Fellowship for Clinicians	2019-10-14	2023-11-20	NCT04916314	Clinical Trials.gov	2021-09-01	2023-07-31	N	N	N	Y	Y	N	N	2021-06-07	86	Y
60	Yes	211100/Z/18/Z	Use of 68Ga-DOTATATE PET to identify the “inflammatory phenotype” in cardiovascular disease: a clinical translational programme	University of Cambridge	Clinical Research Career Development Fellowship	2019-04-01	2025-04-01	NCT04073810	ClinicalTrials.gov	2019-10-01	2023-10-01	N	N	N	Y	N	Y	N	2019-08-27	35	Y
61	Yes	215633/Z/19/Z	The Peek Practice-based Evidence Framework	London School of Hygiene & Tropical Medicine	Collaborative Award in Science	2020-01-01	2025-05-31	ISRCTN96528723	ISRCTN Registry	2021-07-01	2022-12-01	Y	N	N	Y	Y	Y	N	2022-01-06	-189	N
62	Yes	219639/Z/19/Z	Innovative therapeutics for Chagas disease and Cryptosporidiosis	Novartis Institute for BioMedical Research	Innovations HIT NTD Flagship	2020-01-01	2023-12-31	NCT05036668	Clinical Trials.gov	2022-04-07	2022-12-05	N	N	N	Y	N	Y	N	2021-09-05	214	Y
63	Yes	219639/Z/19/Z	Innovative therapeutics for Chagas disease and Cryptosporidiosis	Novartis Institute for BioMedical Research	Innovations HIT NTD Flagship	2020-01-01	2023-12-31	NCT05275855	Clinical Trials.gov	2022-04-29	2023-03-16	N	N	N	Y	N	Y	N	2022-03-11	49	Y
64	Yes	218463/Z/19/Z	Controlled Infection for Testing Efficacy of Hookworm Vaccines in Brazil	Fundação de Desenvolvimento da Pesquisa	Human Infection Studies (Full)	2020-02-01	2025-02-01	Not started yet	Not started yet	NA	NA	NA	NA	NA	NA	NA	NA	NA	NA	NA	NA
65	Yes	215471/Z/19/Z	Optimising AVATAR therapy for distressing voices: a multi-centre randomised controlled trial	King's College London	Innovations Project Award	2019-12-01	2023-11-01	ISRCTN55682735	ISRCTN Registry	2021-01-01	2023-10-31	Y	N	N	Y	Y	Y	N	2020-01-16	351	Y
66	Yes	210572/Z/18/Z	Deciphering AMD by deep phenotyping and machine learning	University of Southampton	Collaborative Award in Science	2019-01-01	2024-12-31	NCT04269304	ClinicalTrials.gov	2019-10-28	2023-12-31	N	N	N	Y	Y	Y	Y	2020-02-11	-106	N
67	Yes	218380/Z/19/Z	Navigation to improve outcome of epilepsy surgery	University College London	Innovator Award	2020-04-01	2023-03-31	ISRCTN72646265	ISRCTN Registry	2020-10-01	2024-09-30	Y	N	N	Y	Y	Y	Y	2020-09-17	14	Y
68	Yes	215843/Z/19/Z	LAMP – REP: Learn, Assess, Manage, Prevent for Relapse in Early Psychosis	Beth Israel Deaconess Medical Centre	Innovator Award: Digital Technologies	2020-04-01	2022-04-01	No update	NA	NA	NA	NA	NA	NA	NA	NA	NA	NA	NA	NA	NA
69	Yes	215492/Z/19/Z	SUNRISE cluster RCT: Scaling Up Nurturing care, a Radio Intervention to Stimulate Early child development in Burkina Faso	London School of Hygiene & Tropical Medicine	Collaborative Award in Science	2020-05-01	2025-04-30	Not started yet	Not started yet	NA	NA	NA	NA	NA	NA	NA	NA	NA	NA	NA	NA
70	Yes	218454/Z/19/Z	Human infection studies for Schistosoma mansoni vaccine testing in Uganda	London School of Hygiene & Tropical Medicine	Human Infection Studies (Full)	2020-06-01	2025-05-31	ISRCTN14033813	ISRCTN Registry	2022-06-27	2024-12-31	N	N	N	Y	Y	Y	N	2021-02-12	500	Y
71	Yes	215663/Z/19/Z	Mogode OCV Booster dose Study (MOBS)	M.A. SANTE	DFID-Wellcome Epidemic Preparedness – Cholera Grant	2020-06-15	2022-06-14	PACTR202102660004195	PACTR	2021-03-01	Not listed	N	N	N	N	NA	N	N	2021-02-11	18	Y
72	Yes	216060/Z/19/Z	The Cannabidiol Early Psychosis Project: A Randomised Controlled Trial	University of Melbourne	Innovations Project Award	2020-06-23	2024-06-22	ACTRN12621000349842	Australian New Zealand Clinical Trials Registry (ANZCTR)	2021-04-15	2024-10-15	N	N	N	Y	N	Y	N	2020-12-15	121	Y
73	Yes	206035/Z/17/Z	Clinical Validation of Optical Molecular Alveoscopy for the Immediate Bed-Side Diagnosis of Pneumonia in the Intensive Care Unit	University of Edinburgh	Translation Fund	2020-07-01	2026-07-01	No update	NA	NA	NA	NA	NA	NA	NA	NA	NA	NA	NA	NA	NA
74	Yes	215524/Z/19/Z	The evaluation and development of novel diagnostic methods to understand and prevent placentally-related complications of human pregnancy	University of Cambridge	Investigator Award in Science	2020-01-01	2026-06-30	ISRCTN12181427	ISRCTN Registry	2020-01-13	2025-08-08	N	N	N	Y	Y	Y	Y	2019-09-26	109	Y
75	Yes	220225/Z/20/Z	Micronutrient interventions to improve infant neurocognitive development and growth in early infancy	King's College London	Senior Research Fellowship	2020-09-01	2025-08-31	PACTR202201552774601	Pan African Clinical Trials Registry	2022-01-01	2025-06-30	N	N	N	Y	Y	Y	N	2021-10-26	67	Y
76	Yes	220690/Z/20/Z	Investigating antimicrobial susceptibility of Rickettsia typhi	University of Oxford	International Training Fellowship	2020-09-01	2023-08-31	Not started yet	Not started yet	NA	NA	NA	NA	NA	NA	NA	NA	NA	NA	NA	NA
77	Yes	221465/Z/20/Z	A pilot study of a culturally appropriate hospital-based pulmonary rehabilitation programme among adults with functionally limiting chronic respiratory diseases in Malawi	Liverpool School of Tropical Medicine	International Masters Fellowship	2020-09-10	2023-03-09	ISRCTN13836793	ISRCTN Registry	2021-10-01	2021-12-31	N	N	N	N	NA	Y	Y	2021-08-20	42	Y
78	Yes	219775/Z/19/Z	ROTA-biotic: measuring the impact of rotavirus vaccines on pediatric antibiotic usage	Amsterdam Institute for Global Health and Development	Impact of vaccines on antimicrobial resistance	2020-07-01	2023-06-30	NCT04010448	ClinicalTrials.gov	2019-10-10	2025-12-15	Y	Y	N	Y	Y	Y	N	2019-07-08	94	Y
79	Yes	221698/Z/20/Z	M72 Phase 2 Trial: Safety & Immunogenicity in People Living with HIV	Gates Medical Research Institute	Discretionary Award – Directorate	2020-11-16	2022-11-15	NCT04556981	ClinicalTrials.gov	2020-11-17	2022-08-31	Y	Y	N	Y	Y	Y	Y	2020-09-21	57	Y
80	Yes	220506/Z/20/Z	Evaluation of a heterologous, two-dose preventive Ebola vaccine for effectiveness and safety in the Democratic Republic of the Congo	University of Surrey	DFID-Wellcome Epidemic Preparedness Grant	2019-11-01	2022-02-28	NCT04152486	ClinicalTrials.gov	2019-11-14	2022-02-28	Y	N	N	Y	Y	N	N	2019-11-05	9	Y
81	Yes	222305/Z/21/Z	Defining the Protective Immune Response to SARS CoV2 Using a Human Challenge Model	University of Oxford	Human Infection Studies (Full)	2021-01-01	2022-07-01	NCT04864548	ClinicalTrials.gov	2021-05-27	2023-11-30	N	N	N	Y	N	Y	N	2021-04-29	28	Y
82	Yes	220505/Z/20/Z	A multi-centre, prospective, double-blinded, pilot study evaluating artificial intelligence driven automatic detection of proximal deep vein thrombosis (DVT).	ThinkSono Ltd	Innovator Award	2021-01-01	2022-04-02	No update	NA	NA	NA	NA	NA	NA	NA	NA	NA	NA	NA	NA	NA
83	Yes	220866/Z/20/Z	Treating hepatitis C in Pakistan. Strategies to avoid resistance to antiviral drugs	Queen Mary University of London	Collaborative Award in Science	2021-01-04	2025-01-03	No update	NA	NA	NA	NA	NA	NA	NA	NA	NA	NA	NA	NA	NA
84	Yes	210735/A/18/Z	Life-course determinants and prevention of violence	ABRASCO	Investigator Award in Science	2018-07-15	2025-07-15	RBR-2kwfsk	Brazilian Clinical Trials Registry (ReBec)	2018-06-18	Not listed	Y	N	N	N	NA	Y	N	2018-06-06	12	Y
85	Yes	219666/Z/19/Z	Human monoclonal antibodies against Shigella (ShiMabs), for therapy and vaccine acceleration	Fondazione Toscana Life Sciences	Innovations AIGH Enterics Flagship	2021-02-08	2024-02-07	No update	NA	NA	NA	NA	NA	NA	NA	NA	NA	NA	NA	NA	NA
86	Yes	215983/Z/19/Z	Next Generation T-cell therapies for CMV post-allogeneic stem cell transplant	University College London	Innovator Award	2021-03-01	2023-08-28	No update	NA	NA	NA	NA	NA	NA	NA	NA	NA	NA	NA	NA	NA
87	Yes	221586/Z/20/Z	‘DuoChol: A low-cost, thermostable dry formulation whole-cell / B-subunit enterocoated capsule oral cholera vaccine.’	University of Gothenburg	Innovations AIGH Enterics Flagship	2021-03-01	2022-07-29	No update	NA	NA	NA	NA	NA	NA	NA	NA	NA	NA	NA	NA	NA
88	Yes	223016/Z/21/Z	Can we develop a "cognitive vaccine" for intrusive memories of traumatic events from working in the COVID-19 pandemic? A novel and brief intervention to support ICU staff	P1vital Products Ltd	Discretionary Award - Mental Health	2021-03-01	2023-09-30	NCT04992390	ClinicalTrials.gov	2021-08-24	2021-07-31	N	N	N	Y	Y	Y	Y	2021-08-05	19	Y
89	Yes	222154/Z/20/Z	Studying the Contexts of recent Onset Psychoses in Ethiopia to develop interventions to improve outcomes: the SCOPE study	King's College London	Innovations Psychosis Flagship	2021-05-10	2026-05-09	No update	NA	NA	NA	NA	NA	NA	NA	NA	NA	NA	NA	NA	NA
90	Yes	218528/Z/19/Z	Establishing Shigella Human Infection Studies in an endemic population in Kenya for evaluating Shigella vaccines	University of Oxford	Human Infection Studies (Full)	2021-06-01	2026-05-31	Not started yet	Not started yet	NA	NA	NA	NA	NA	NA	NA	NA	NA	NA	NA	NA
91	Yes	219417/Z/19/Z	Understanding and disrupting the link between obesity and metabolic disease	University of Cambridge	Senior Research Fellowship Renewal	2021-07-01	2026-06-30	NCT03900286	ClinicalTrials.gov	2019-07-16	2023-05-30	N	N	N	Y	N	Y	N	2019-04-03	104	Y
92	Yes	221940/Z/20/Z	ALIVE: Improving Adolescent mentaL health by reducing the Impact of poVErty	King's College London	Collaborative Award in Science	2021-07-01	2026-06-30	No update	NA	NA	NA	NA	NA	NA	NA	NA	NA	NA	NA	NA	NA
93	Yes	222007/Z/20/Z	Interactive play: a strategy to improve nurturing care and movement behaviours for infants	University of the Witwatersrand	International Training Fellowship	2021-07-01	2024-06-30	No update	NA	NA	NA	NA	NA	NA	NA	NA	NA	NA	NA	NA	NA
94	Yes	222159/Z/20/Z	Phase 1 clinical studies for MDI-478: An AMPA receptor positive allosteric modulator for the treatment of cognitive impairment associated with schizophrenia	Cardiff University	Innovations Psychosis Flagship	2021-07-01	2024-06-30	No update	NA	NA	NA	NA	NA	NA	NA	NA	NA	NA	NA	NA	NA
95	Yes	222759/Z/21/Z	Development of a needle-free, high-density microarray patch (HD-MAP) delivering a typhoid conjugate vaccine (Vi-DT), to improve access to, and effectiveness of, Vi-DT	Vaxxas Pty. Ltd.	Innovations AIGH Enterics Flagship	2021-07-01	2023-06-30	Not started yet	Not started, but likely to be ANZCTR	NA	NA	NA	NA	NA	NA	NA	NA	NA	NA	NA	NA
96	Yes	222011/Z/20/Z	Optimising dosing of dihydroartemisinin-piperaquine for malaria preventive treatment in Malawian infants	Liverpool School of Tropical Medicine	International Training Fellowship	2021-08-01	2024-07-31	Not started yet	Not started yet	NA	NA	NA	NA	NA	NA	NA	NA	NA	NA	NA	NA
97	Yes	219468/Z/19/Z	AlCohol use in HumanitariAN settings: a programme of work to address alcohol and associated adversities among conflict-affected populations in UGanda and UkrainE (CHANGE)	London School of Hygiene & Tropical Medicine	Collaborative Award in Science	2020-07-01	2025-06-30	Not started yet	Not started yet	NA	NA	NA	NA	NA	NA	NA	NA	NA	NA	NA	NA
98	Yes	220211/Z/20/Z	Thailand Africa and Asia Programme - GBP Core	University of Oxford	Africa and Asia Programmes	2020-10-01	2025-09-30	TCTR20180710007	Thai Clinical Trials Registry (TCTR)	2019-12-14	2021-10-21	N	N	N	N	NA	N	N	2018-07-10	522	Y
99	Yes	220684/Z/20/Z	Intervention for Depression In underserved Geriatric Populations (INDIGO)	College of Medicine, University of Ibadan	International Intermediate Fellowship	2020-10-01	2025-09-30	Not started yet	Not started yet	NA	NA	NA	NA	NA	NA	NA	NA	NA	NA	NA	NA
100	Yes	222558/Z/21/Z	Scaling an affordable wireless vital signs monitor for patients in low-resource settings	Neopenda PBC	Innovations LMIC Flagship	2021-10-01	2023-05-30	Not started yet	Not started yet	NA	NA	NA	NA	NA	NA	NA	NA	NA	NA	NA	NA
101	Yes	222695/Z/21/Z	Development of in-vivo 19F Clinical MR imaging Using a Novel 19F/1H Coil in Combination with an Intravenous Perfluorocarbon (ABL-101)	University of Glasgow	Innovator Award	2021-08-01	2023-10-31	Not started yet	Not started yet	NA	NA	NA	NA	NA	NA	NA	NA	NA	NA	NA	NA
102	Yes	222754/Z/21/Z	Optimising pharmacometric assessment in phase 2 studies of Chagas disease	University of Oxford	Innovations HIT NTD Flagship	2021-03-01	2024-02-29	ISRCTN26467068	ISRCTN Registry	2022-06-01	2024-12-01	N	N	N	Y	Y	Y	Y	2021-07-01	335	Y
103	Yes	223195/Z/21/Z	Finding treatments for COVID-19: A phase 2 multi-centre adaptive platform trial to assess antiviral pharmacodynamics in early symptomatic COVID-19 (PLAT-COV)	University of Oxford	Therapeutics Accelerator	2021-08-01	2023-07-31	NCT05041907	ClinicalTrial.gov	2021-09-30	2023-08-31	N	N	N	Y	Y	Y	Y	2021-09-13	17	Y
104	Yes	223880/Z/21/Z	Intraoperative hyperspectral imaging for real-time quantitative fluorescence-guided surgery of low-grade glioma	King's College London	Innovator Award	2022-04-01	2025-03-31	Not started yet	Not started yet	NA	NA	NA	NA	NA	NA	NA	NA	NA	NA	NA	NA
105	Yes	223940/Z/21/Z	Light-activated cap for catheters sterilization	i3S - Instituto de Investigação e Inovação em Saúde, Universidade do Porto	Innovator Award	2022-02-01	2025-01-31	Not started yet	Not started yet	NA	NA	NA	NA	NA	NA	NA	NA	NA	NA	NA	NA

## Sheet: Data Dictionary
Variable	Definition
Required to comply with May18 policy	Was the grant awarded on or after 1st May 2018 (Y=Yes, N=No)
Grant code	Unique code allocated by Wellcome
Trial Title	Title of the trial either from application or registry
Grantholder Organisation	Host institution where grantholder is employed
Grant Type	Wellcome grant category
Grant Start Date	Grant Start Date from Wellcome database
Grant End Date	Grant End Date from Wellcome database
Trial registry ID	Trial registry ID as reported by grantholder
Trial registry	Trial registry
Trial start date	Trial start date from registry entry
Trial end date	Trial end date from registry entry
Protocol available	Grantholder reported to Wellcome that the protocol is published publically
SAP available	Grantholder reported to Wellcome that the SAP is published publically
Summary results posted	Summary results are available on the registry where the trial is registered
Provided data sharing plan	Provided data sharing plan on the registry entry
Plan to share IPD	Plan to share individual patient/participant data as written on registry entry or report to Wellcome
Wellcome listed as a funder/collaborator on registry?	Wellcome listed as a funder/collaborator on the trial registry entry
Grant no listed on registry?	Wellcome unqiue grant code listed on the trial registry entry
Registry submission date	Date listed on registry as 'first submitted'
Days between registration and recruitment	Date recruitment started minus the registration submission date
Preospectively registered	Y=Yes N=No
